# Supplementary material
Source: PubMed Central journal article supplement (PMC8193389)
Supplement: 12250_2016_3710_MOESM1_ESM.pdf [file 12250_2016_3710_MOESM1_ESM.pdf]

## Electronic Supplementary Material

### Characterization of the viral fibroblast growth factor homolog of *Helicoverpa armigera* single nucleopolyhedrovirus

Feifei Yin<sup>1,2#</sup>, Ruikun Du<sup>1#</sup>, Wenhua Kuang<sup>1</sup>, Guang Yang<sup>1</sup>, Hualin Wang<sup>1</sup>, Fei Deng<sup>1</sup>, Zhihong Hu<sup>1</sup>, Manli Wang<sup>1</sup>✉

1. State Key Laboratory of Virology and China Center for Virus Culture Collection, Wuhan Institute of Virology, Chinese Academy of Sciences, Wuhan 430071, China
2. School of Tropical and Laboratory Medicine, Hainan Medical University, Haikou 571101, China

Supporting information to DOI: 10.1007/s12250-016-3710-z

Table S1. Sequences of primers used for PCR amplification

| Primer       | Primer sequence (5'–3')             |
|--------------|-------------------------------------|
| anti-vFGF-f  | GCGGGATCCAGACCGGGCGGACGAAAC         |
| anti-vFGF-r  | GCGAAGCTTCATGTACGTTACAACAACAG       |
| vFGF trans-f | CGTGCCGTTATATTTGCGTTAACCAATGC       |
| vFGF trans-r | CAGAGGTAACATGGATGATGTCTGTGG         |
| del-F1f      | CGGGGTACCATACAAATTCAACCTGCGAACTC    |
| del-F1r      | CCGCTCGAGATCATCCATGTTACCTCTGAC      |
| del-F2f      | CCGGATATCGTGCGAGTCAGTAGAATTTGTT     |
| del-F2r      | CTAGTCTAGAATTTCTAACACATTCTATGCGATTG |
| vfgf-f       | GCGCTCGAGTGGAGCAGATTCAAGATTCGCC     |
| vfgf-r       | GCGGGTACCCATGTACGTTACAACAACAG       |
